# Supplementary material for: Successful Formulation and Application of Low-Temperature Bacterial Agents for Corn Stover Degradation
Source: MDPI journal article supplement (doi:10.3390/agronomy13041032), 2023-03-31
Supplement: s1 [file s1]

Supplementary materials

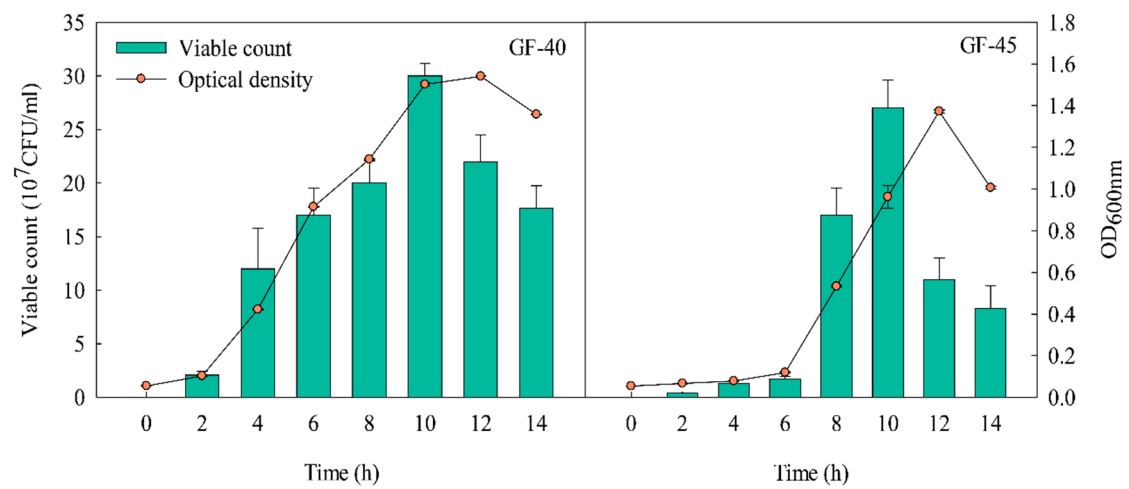

Figure S1. OD<sub>600</sub> values and viable bacterial counts during bacterial fermentation.

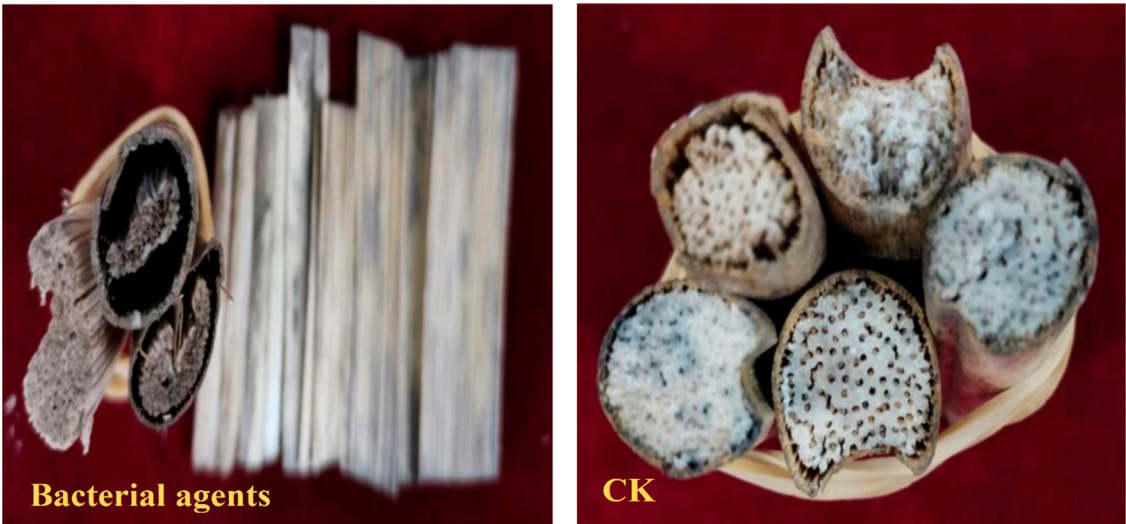

Figure S2. Comparison of the degradation effect of the bacterial agent and control groups in the laboratory test conditions.

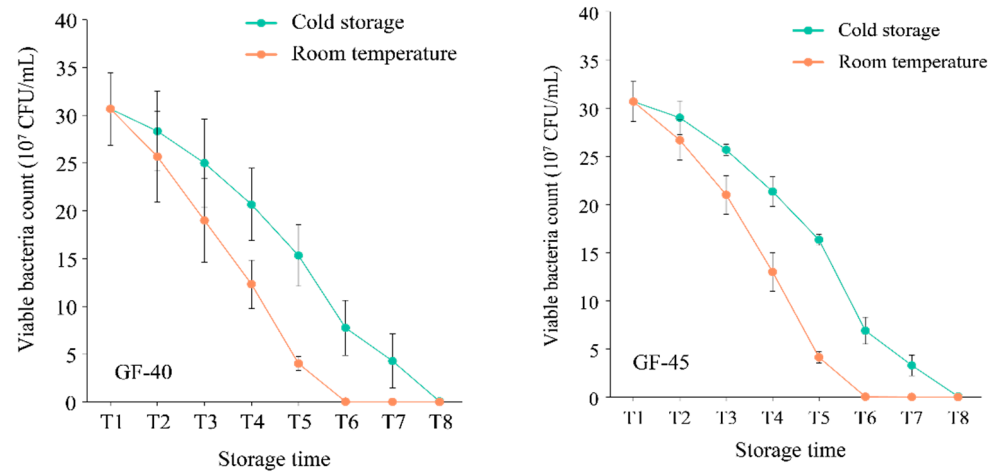

**Figure S3.** Viable bacterial counts in bacterial solutions at different storage temperatures.

**Table S1.** Formulation of bacterial agents with a single additive.

| Additive             | Corn stalk husk powder | Starch | Bran |
|----------------------|------------------------|--------|------|
| Precipitate:additive | 1:8                    | 1:8    | 1:8  |
|                      | 1:6                    | 1:6    | 1:6  |
|                      | 1:4                    | 1:4    | 1:4  |

**Table S2.** Formulation of bacterial agents with two types of additives.

| Combination of additives | C+S |     |     | C+B |     |     | S+B |     |     |
|--------------------------|-----|-----|-----|-----|-----|-----|-----|-----|-----|
| Precipitate:additive     | 1:8 | 1:6 | 1:4 | 1:8 | 1:6 | 1:4 | 1:8 | 1:6 | 1:4 |
| Ratio of additives       | 1:1 | 1:1 | 1:1 | 1:1 | 1:1 | 1:1 | 1:1 | 1:1 | 1:1 |
|                          | 1:2 | 1:2 | 1:2 | 1:2 | 1:2 | 1:2 | 1:2 | 1:2 | 1:2 |
|                          | 1:3 | 1:3 | 1:3 | 1:3 | 1:3 | 1:3 | 1:3 | 1:3 | 1:3 |
|                          | 3:1 | 3:1 | 3:1 | 3:1 | 3:1 | 3:1 | 3:1 | 3:1 | 3:1 |
|                          | 2:1 | 2:1 | 2:1 | 2:1 | 2:1 | 2:1 | 2:1 | 2:1 | 2:1 |

C: corn stalk husk powder; S: starch; B: bran.

**Table S3.** Formulation of bacterial agents with three types of additives.

| P:A | A:P | S:B | P:A | A:P | S:B | P:A | A:P | S:B |
|-----|-----|-----|-----|-----|-----|-----|-----|-----|
| 1:8 | 1:1 | 1:1 | 1:1 | 1:1 | 1:1 | 1:4 | 1:1 | 1:1 |
|     |     | 1:2 |     |     | 1:2 |     |     | 1:2 |
|     |     | 1:3 |     |     | 1:3 |     |     | 1:3 |
|     |     | 3:1 |     |     | 3:1 |     |     | 3:1 |
|     |     | 2:1 |     |     | 2:1 |     |     | 2:1 |
|     | 1:2 | 1:1 | 1:2 | 1:2 | 1:1 |     | 1:2 | 1:1 |
|     |     | 1:2 |     |     | 1:2 |     |     | 1:2 |
|     |     | 1:3 |     |     | 1:3 |     |     | 1:3 |
|     |     | 3:1 |     |     | 3:1 |     |     | 3:1 |
|     |     | 2:1 |     |     | 2:1 |     |     | 2:1 |
|     | 1:3 | 1:1 | 1:6 | 1:3 | 1:1 |     | 1:3 | 1:1 |
|     |     | 1:2 |     |     | 1:2 |     |     | 1:2 |
|     |     | 1:3 |     |     | 1:3 |     |     | 1:3 |
|     |     | 3:1 |     |     | 3:1 |     |     | 3:1 |
|     |     | 2:1 |     |     | 2:1 |     |     | 2:1 |
|     | 3:1 | 1:1 | 3:1 | 3:1 | 1:1 |     | 3:1 | 1:1 |
|     |     | 1:2 |     |     | 1:2 |     |     | 1:2 |
|     |     | 1:3 |     |     | 1:3 |     |     | 1:3 |
|     |     | 3:1 |     |     | 3:1 |     |     | 3:1 |
|     |     | 2:1 |     |     | 2:1 |     |     | 2:1 |
|     | 2:1 | 1:1 | 2:1 | 2:1 | 1:1 |     | 2:1 | 1:1 |
|     |     | 1:2 |     |     | 1:2 |     |     | 1:2 |
|     |     | 1:3 |     |     | 1:3 |     |     | 1:3 |
|     |     | 3:1 |     |     | 3:1 |     |     | 3:1 |
|     |     | 2:1 |     |     | 2:1 |     |     | 2:1 |

P:A: Precipitate: additive; A:P: Adsorbent:protective agents; S:B: Starch:bran.
